# Supplementary material for: Separation and phase transition investigation of Yb3+/Er3+ co-doped NaYF4 nanoparticles
Source: Royal Society of Chemistry journal article supplement (doi:10.1039/c3dt51652k), 2013-01-01
Supplement: c3dt51652k.pdf [file c3dt51652k.pdf]

# Separation and Phase Conversion Investigation of $\text{Yb}^{3+}/\text{Er}^{3+}$ Codoped $\text{NaYF}_4$ Nanoparticles

Sha Song,<sup>a</sup> Yun Kuang,<sup>a</sup> Junfeng Liu,<sup>a</sup> Qing Yang,<sup>b</sup> Liang Luo,<sup>\*a</sup> and  
Xiaoming Sun<sup>\*a</sup>

<sup>a</sup> State Key Laboratory of Chemical Resource Engineering, P.O. Box 98, Beijing  
University of Chemical Technology, Beijing 100029, P. R. China

<sup>b</sup> Department of Clinic Veterinary Medicine, College of Veterinary Medicine,  
Hunan Agricultural University, Changsha 410128, P. R. China

\* Corresponding authors: luoliang@mail.buct.edu.cn; sunxm@mail.buct.edu.cn

## Experimental

### Experimental details

**Materials:** All the chemicals were A. R. grade, bought from Beijing Chemical Reagent Co., Inc., and used as received without further purification.

#### 1. Synthesis of NaYF<sub>4</sub>:Yb/Er

In the typical synthesis, 1.2 g NaOH was dissolved in 5 mL deionized water, mixed with 7 mL ethanol and 20 mL oleic acid. To the mixture added 1 mL 0.5 mol/L RE(NO)<sub>3</sub> (RE= Y, Yb, Er, volume ratio: 78:20:2) and 3 mL 1 mol/L NaF under stirring. The solution was then transferred into a Teflon-lined autoclave (40 mL) and heated to 200 °C and aged at that temperature for 20 h. The final products were collected by centrifugation, washed with ethanol and cyclohexane twice, and finally re-dispersed in cyclohexane for separation.

#### 2. Separation of NaYF<sub>4</sub>:Yb/Er

##### (1) Density gradient preparation

All separation experiments were performed using a Beckman Optima L8-80M ultracentrifuge. Typically a five-layer step gradient was made using 30%, 40%, 50%, 60%, and 70% concentrations (by volume) of solutions of CCl<sub>4</sub> in cyclohexane. For instance, a volume ratio of CCl<sub>4</sub>:cyclohexane = 7:3 was used to make the 70% solution. A step gradient was created directly in Beckman centrifuge tubes (polyallomer) by adding layers to the tube with decreasing density (i.e., lower CCl<sub>4</sub> concentration).

To make a (30% + 40% + 50% + 60% + 70%) gradient, 2 mL of 70% solutions of CCl<sub>4</sub> in cyclohexane was first added to the centrifuge tube, then 2 mL 60% solutions of CCl<sub>4</sub> in cyclohexane was slowly layered above the 70% layer. The subsequent layers were made following the same procedure and resulted in a density gradient along the centrifuge tube.

## **(2) Separation of NaYF<sub>4</sub>: Yb/Er**

0.4 mL of NaYF<sub>4</sub>: Yb<sup>3+</sup>/Er<sup>3+</sup> colloid solution was added on top of the five-layer step gradient, and centrifuged at 10,000 rpm for 10 minutes (a photograph of the ultracentrifuge tube after separation is shown in Fig. 1A). The gradient medium containing separated nanocrystal was manually sampled in fractions of 400 μL for characterization.

## **3. Characterization of nanocrystals**

Transmission electron microscopy (TEM): A transmission electron microscope (Hitachi H-800, operated at 200 kV) was used to evaluate nanorod size and shape. Fractions obtained by gradient separation were directly dried on carbon film supported on copper grids. X-ray diffraction (XRD): XRD patterns of samples were recorded on a Shimadzu XRD-6000 diffractometer with Cu K $\alpha$  radiation (40 kV, 30 mA,  $\lambda = 1.5418 \text{ \AA}$ ). The optical properties of the NPs were characterized using a Hitachi F-4600 fluorescence spectrophotometer operated at room temperature with a 980 nm diode laser with a fiber optic accessory (Beijing Hi-Tech Optoelectronic Co.).

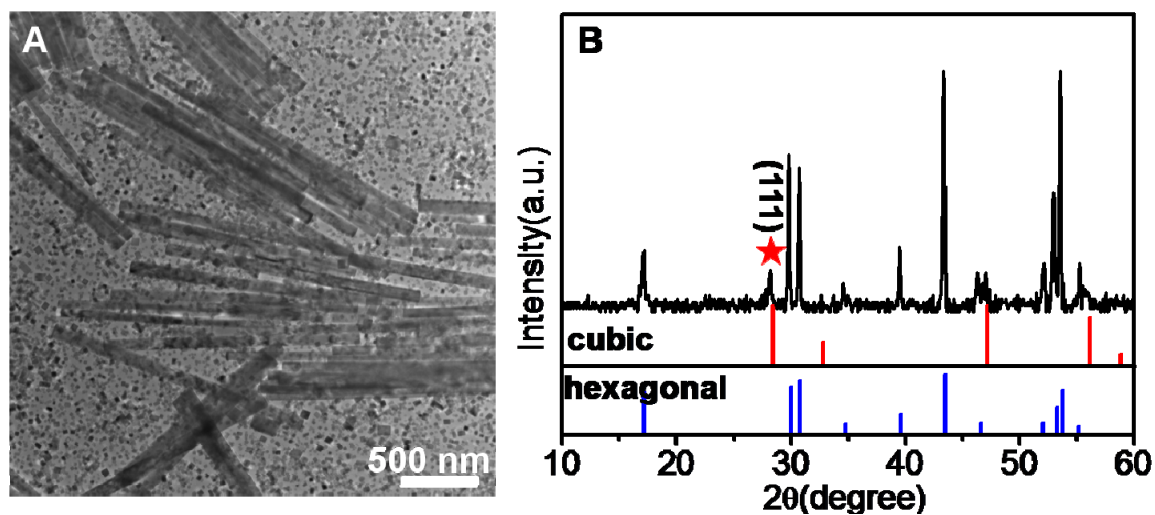

**Fig. S1** (A) TEM image of  $\text{NaYF}_4:\text{Yb}^{3+}/\text{Er}^{3+}$ ; (B) XRD patterns of prepared  $\text{NaYF}_4:\text{Yb}^{3+}/\text{Er}^{3+}$  and standard dates for cubic and hexagonal of  $\text{NaYF}_4:\text{Yb}^{3+}/\text{Er}^{3+}$ .

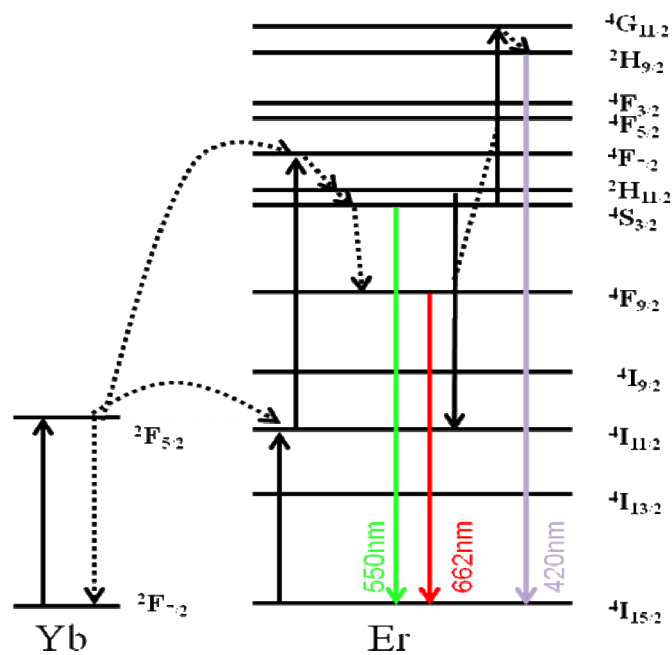

**Fig. S2** Energy-level diagram of  $\text{NaYF}_4:\text{Yb}^{3+}/\text{Er}^{3+}$  and UC process under 980 nm excitation

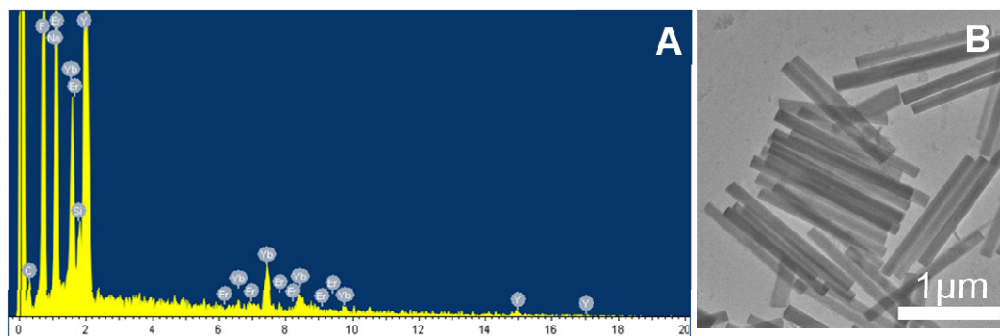

**Fig. S3** Energy dispersive spectrum (A) and TEM images (B) of  $\text{NaYF}_4:\text{Yb}^{3+}/\text{Er}^{3+}$  after 7 days .

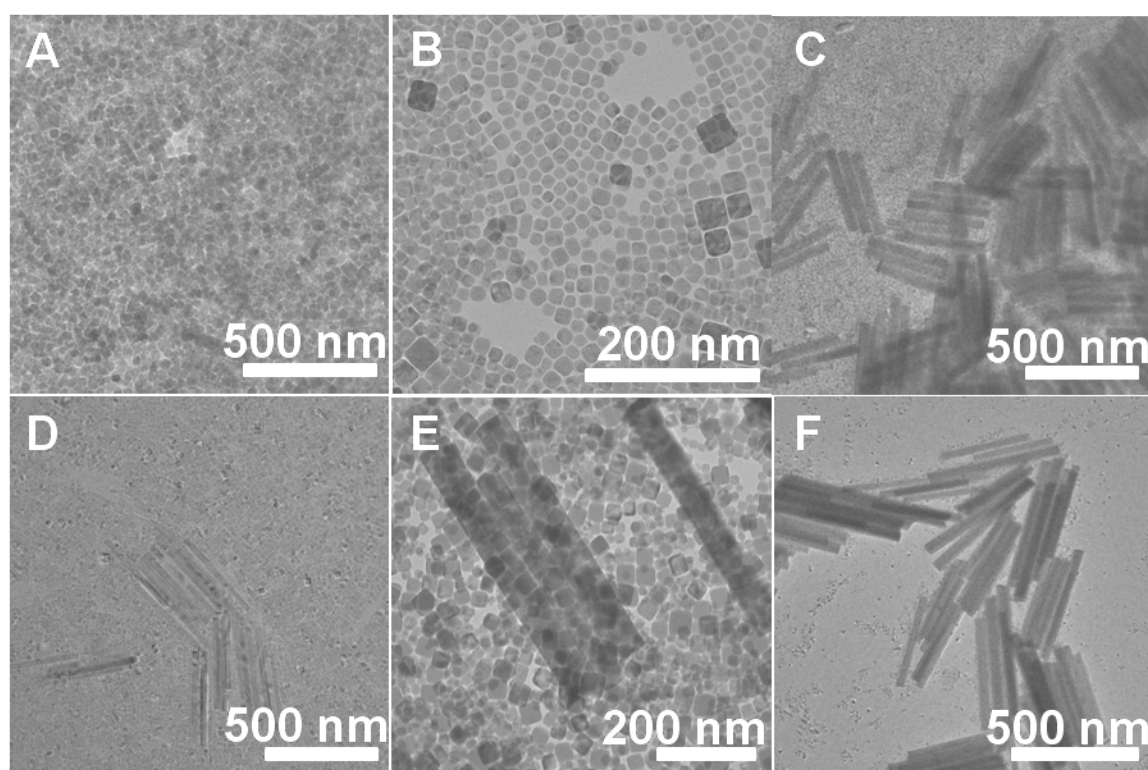

**Fig. S4** TEM images of the samples heated with 1.5 h: (A)  $\text{NaYF}_4$ , (B)  $\text{NaYbF}_4$ , (C)  $\text{NaErF}_4$  ; 2h: (D)  $\text{NaYF}_4$ , (E)  $\text{NaYbF}_4$ , (F)  $\text{NaErF}_4$ .

| fraction | Y:Yb:Er | Average |
|----------|---------|---------|
| f1       | 84:15:1 | 83:15:2 |
|          | 83:15:2 |         |
|          | 83:14:3 |         |
| f14      | 84:14:2 | 82:16:2 |
|          | 81:17:2 |         |
|          | 81:18:1 |         |
| f18      | 74:22:4 | 74:22:4 |
|          | 75:22:3 |         |
|          | 72:24:4 |         |

Figure S5. Energy dispersive spectra of typical fractions: f1, f14 and f18.
